# Supplementary material for: n-3 PUFA Promotes Ferroptosis in PCOS GCs by Inhibiting YAP1 through Activation of the Hippo Pathway
Source: MDPI journal article supplement (doi:10.3390/nu15081927), 2023-04-16
Supplement: s1 [file s1]

| Gene           | Primer sequence (5' → 3')                                |
|----------------|----------------------------------------------------------|
| <i>TFRC</i>    | F: ACCATTGTCATATACCCGGTTCA<br>R: CAATAGCCCAAGTAGCCAATCAT |
| <i>ACSL4</i>   | F: CATCCCTGGAGCAGATACTCT<br>R: TCACTTAGGATTTCCCTGGTCC    |
| <i>SLC7A11</i> | F: TCTCCAAAGGAGGTTACCTGC<br>R: AGACTCCCCTCAGTAAAGTGAC    |
| <i>FTH</i>     | F: ACTTTGACCGCGATGATGTG<br>R: GCTCTCCCAGTCATCACAGT       |
| <i>FTL</i>     | F: ATGGGGTGCGGACTTAGAAAG<br>R: CTTGCGGTCTCTTCAGGGTAG     |
| <i>MST1</i>    | F: CAAGGTCTGGACGACAACTATTG<br>R: CAGTGGTGGTATTGGCTGTG    |
| <i>MST2</i>    | F: CGATGTTGGAATCCGACTTGG<br>R: GTCTTTGTACTTGTGGTGAGGTT   |
| <i>LATS1</i>   | F: TTACCAAGATCCTCGACGAGAG<br>R: CACATTCCCTGGTTTCATGCT    |
| <i>LATS2</i>   | F: ACTTTTCCTGCCACGACTTATTC<br>R: GATGGCTGTTTTAACCCCTCA   |
| <i>NRF2</i>    | F: TTCCCGGTCACATCGAGAG<br>R: TCCTGTTGCATACCGTCTAAATC     |
| <i>β-actin</i> | F: CATGTACGTTGCTATCCAGGC<br>R: CTCCTTAATGTCACGCACGAT     |

**Supplementary Table S1.** The primer sequences used for qRT-PCR. F: forward, R: reverse. U6 and *β-actin* were used as endogenous control genes for miRNA and mRNA, respectively.
